# Supplementary material
Source: publisher site journal article supplement (https://www.dovepress.com/article/297896)
Supplement: Supplementary file 1 [file get_supplementary_file.php]

Supplementary File

Part one

Table S1 – relation between indications for PPV and NEI VFQ25 subscales

| Subdomains | Indication | | | | | | | | | | | | | |
| --- | --- | --- | --- | --- | --- | --- | --- | --- | --- | --- | --- | --- | --- | --- |
| VH | | RRD | | TRD | | Macular hole | | Dropped lens | | Inflammatory | | ERM | |
| Mean | Standard Deviation | Mean | Standard Deviation | Mean | Standard Deviation | Mean | Standard Deviation | Mean | Standard Deviation | Mean | Standard Deviation | Mean | Standard Deviation |
| General health | 56.5 | 27.4 | 72.5 | 24.2 | 56.0 | 27.3 | 75.0 | 35.4 | 83.3 | 20.4 | 56.3 | 12.5 | 58.3 | 38.2 |
| General vision | 59.35 | 19.65 | 70.00 | 17.77 | 50.48 | 29.41 | 80.00 | 28.28 | 76.67 | 8.16 | 50.00 | 20.00 | 40.00 | 20.00 |
| Ocular pain | 89.52 | 16.17 | 88.75 | 15.12 | 87.50 | 19.36 | 100.00 | .00 | 91.67 | 15.14 | 78.13 | 15.73 | 100.00 | .00 |
| Near activity | 76.81 | 29.36 | 78.34 | 17.60 | 58.14 | 35.17 | 83.35 | 23.55 | 100.00 | .00 | 56.25 | 34.29 | 69.43 | 52.94 |
| Distance activities | 80.65 | 23.01 | 87.70 | 13.36 | 63.50 | 35.31 | 93.75 | 8.84 | 98.62 | 3.39 | 62.50 | 19.86 | 72.23 | 41.12 |
| social functions | 74.19 | 27.75 | 90.63 | 15.11 | 57.74 | 36.55 | 81.25 | 26.52 | 95.83 | 6.45 | 75.00 | 30.62 | 87.50 | 21.65 |
| mental health | 62.32 | 29.86 | 69.09 | 26.23 | 42.28 | 30.88 | 87.50 | 17.68 | 83.37 | 17.95 | 34.40 | 10.82 | 68.77 | 18.75 |
| Role difficulties | 66.13 | 37.80 | 79.37 | 20.79 | 47.02 | 33.98 | 100.00 | .00 | 91.67 | 12.91 | 37.50 | 43.30 | 70.83 | 19.09 |
| Dependency | 65.59 | 29.80 | 82.08 | 22.18 | 55.15 | 38.23 | 87.50 | 17.68 | 91.67 | 10.55 | 41.65 | 28.85 | 61.10 | 47.40 |
| Driving | 53.20 | 44.81 | 63.72 | 38.97 | 26.39 | 41.11 | . | . | 91.65 | 9.64 | .00 | . | 75.00 | .00 |
| Color vision | 90.00 | 18.10 | 95.00 | 13.08 | 80.00 | 32.04 | 100.00 | .00 | 100.00 | .00 | 87.50 | 25.00 | 91.67 | 14.43 |
| Peripheral vision | 81.45 | 26.59 | 77.50 | 25.52 | 55.95 | 41.76 | 75.00 | 35.36 | 95.83 | 10.21 | 93.75 | 12.50 | 83.33 | 28.87 |

VH: Vitreous hemorrhage, RRD: Rheugmatogenous retinal detachment, TRD: Tractional retinal detachment, ERM: Epiretinal membrane

Part Two (Supplements 1): Arabic Version of NEI – VFQ 25

National Eye Institute

**استطلاع عن الأداء البصري-** 25

**(**VFQ-25**)**

**نسخة** 2000

**(يُجري على يد محاور)**

**يناير** 2000

**RAND hereby grants permission to use the "National Eye Institute Visual Functioning Questionnaire 25 (VFQ-25) July 1996, in accordance with the following conditions which shall be assumed by all to have been agreed to as a consequence of accepting and using this document:**

**1. Changes to the NEI VFQ-25 - July 1996 may be made without the written permission of RAND. However, all such changes shall be clearly identified as having been made by the recipient.**

**2. The user of this NEI VFQ-25 - July 1996 accepts full responsibility, and agrees to hold RAND harmless, for the accuracy of any translations of the NEI VFQ-25 Test Version - July 1996 into another language and for any errors, omissions, misinterpretations, or consequences thereof.**

**3. The user of this NEI VFQ-25 - July 1996 accepts full responsibility, and agrees to hold RAND harmless, for any consequences resulting from the use of the NEI VFQ-25.**

**4. The user of the NEI VFQ-25 - July 1996 will provide a credit line when printing and distributing this document or in publications of results or analyses based on this instrument acknowledging that it was developed at RAND under the sponsorship of the National Eye Institute.**

**5. No further written permission is needed for use of this NEI VFQ-25 - July 1996.**

**7/29/96**

تعليمات:

**سأطرح عليك بعض الأسئلة بخصوص مشاكل تتعلّق ببصرك أو أحاسيس تشعر/تشعرين بها تتعلق بحالة بصرك. بعد كل سؤال سأقرأ عليك قائمة بالإجابات المحتملة. يُرجى اختيار الإجابة التي تنطبق عليك بأفضل شكل.**

**يُرجى الإجابة عن جميع الأسئلة سواء كنت تلبس/تلبسين نظارة أو عدسات لاصقة أم لا. وإذا كنت تستخدم/تستخدمين إحداهما ولا تضعها/تضعينها الآن، فتخيّل/تخيَّلى أنك تلبسها/تلبسينها ثم أجب/أجبى.**

**رجاءً خذ/خذى الوقت الذي تحتاجه/تحتاجينه من أجل الإجابة على كلّ سؤال. جميع إجاباتك سريّة. من أجل أن يُحسّن هذا الاستطلاع معرفتنا حول المشاكل البصرية وكيف تؤثر على جودة حياتك، يجب على إجاباتك أن تكون دقيقة قدر الإمكان. تذكر/تذكرى، إن كنت تلبس/تلبسين نظارة أو عدسات لاصقة عند قيامك بنشاط معيّن، رجاءً أجب/أجبى على جميع الأسئلة التالية وكأنك تلبسها/تلبسينها.**

# **استطلاع عن الأداء البصري- 25**

الجزءالأوّل – الصّحة العامّة والبصر

1. بشكل عام، هل يمكنك القول أن صحّتك العامة *:

(ضع/ضعى دائرة حول إجابة واحدة)

| اقرأ/اقرئي الاختيارات: | ممتازة | 1 |
| --- | --- | --- |
| **جيدة جدًا** | **2** |
| **جيدة** | **3** |
| **معتدلة** | **4** |
| **سيئة** | **5** |

2. في الوقت الحالي، هل تقول/تقولين أن بصرك في العينيْن (وأنت لابس/لابسة نظارتك أو عدساتك اللاصقة، إذا كنت تستخدم/تستخدمين إحداهما) هو ممتاز، جيد، معتدل، سيء أو سيء جدًا أم أنك كفيفاً/كفيفةً؟

(ضع/ضعى دائرة حول إجابة واحدة)

| اقرأ/اقرئي الاختيارات: | ممتاز | 1 |
| --- | --- | --- |
| **جيد** | **2** |
| **معتدل** | **3** |
| **سيئ** | **4** |
| **سيئ جدًا** | **5** |
| **كفيفًا** | **6** |

**______________________**

* **اترك/اتركى سؤال 1 عندما يُستخدم استطلاع VFQ-25 في نفس الوقت مع استطلاع SF-36 أو RAND 36-Item Health Survey 1.0**

3. كم من الوقت تقلق/تقلقين بسبب بصرك؟

(ضع/ضعى دائرة حول إجابة واحدة)

| اقرأ/اقرئي الاختيارات: | أبدًا | 1 |
| --- | --- | --- |
| **نادرًا** | **2** |
| **أحيانًا** | **3** |
| **معظم الوقت** | **4** |
| **دائمًا** | **5** |

4. ما هو مقدار الألم أو الشعور بعدم الرّاحة داخل عينيك أو حولهما (مثلاً: حرقان، حكة، أو وجع)؟

(ضع/ضعى دائرة حول إجابة واحدة)

| اقرأ/اقرئي الاختيارات: | لا يوجد | 1 |
| --- | --- | --- |
| **خفيف** | **2** |
| **معتدل** | **3** |
| **شديد** | **4** |
| **شديد جدًا** | **5** |

الجزء الثانى – صعوبة فى النشاطات اليومية

الأسئلة التالية تستفسر عن درجة الصعوبة، إن وجدت، التي تواجهها/تواجهينها أثناء قيامك بنشاطات معيّنة وأنت تلبس/تلبسين نظارتك أو عدساتك اللاصقة إذا كنت تستخدمهما/تستخدمينهما في هذا النشاط.

5. ما درجة الصعوبة التي تواجهها/تواجهينها في قراءة خط طباعة عادي في الصحف؟

**(اقرأ/اقرئي الاختيارات)**

(ضع/ضعى دائرة حول إجابة واحدة)

| لا تواجه/تواجهين صعوبة بتاتًا | 1 |
| --- | --- |
| **تواجه/تواجهين قليلاً من الصعوبة** | **2** |
| **تواجه/تواجهين صعوبة معتدلة** | **3** |
| **تواجه/تواجهين صعوبة شديدة جدًا** | **4** |
| **توقفت عن القيام بذلك بسبب بصرك** | **5** |
| **توقفت عن القيام بذلك لأسباب أخرى أو لأنّك غير مهتم/مهتمة بعمل ذلك** | **6** |

6. ما درجة الصعوبة التي تواجهها/تواجهينها أثناء قيامك بعمل أو بهوايات تتطلب منك رؤية جيّدة وعن قرب، كالطبخ، الخياطة، تصليح الأشياء في المنزل، أو استخدام أدوات يدويّة؟

**(اقرأ/اقرئى الاختيارات)**

(ضع/ضعى دائرة حول إجابة واحدة)

| لا تواجه/تواجهين صعوبة بتاتًا | 1 |
| --- | --- |
| **تواجه/تواجهين قليلاً من الصعوبة** | **2** |
| **تواجه/تواجهين صعوبة معتدلة** | **3** |
| **تواجه/تواجهين صعوبة شديدة جدًا** | **4** |
| **توقفت عن القيام بذلك بسبب بصرك** | **5** |
| **توقفت عن القيام بذلك لأسباب أخرى أو لأنّك غير مهتم/مهتمة بعمل ذلك** | **6** |

7. بسبب بصرك، ما درجة الصعوبة التي تواجهها/تواجهينها عند محاولتك إيجاد شيء على رف مزدحم؟

**(اقرأ/اقرئي الاختيارات)**

(ضع/ضعى دائرة حول إجابة واحدة)

| لا تواجه/تواجهين صعوبة بتاتًا | 1 |
| --- | --- |
| **تواجه/تواجهين قليلاً من الصعوبة** | **2** |
| **تواجه/تواجهين صعوبة معتدلة** | **3** |
| **تواجه/تواجهين صعوبة شديدة جدًا** | **4** |
| **توقفت عن القيام بذلك بسبب بصرك** | **5** |
| **توقفت عن القيام بذلك لأسباب أخرى أو لأنّك غير مهتم/مهتمة بعمل ذلك** | **6** |

8. ما مدى الصعوبة التي تواجهها/تواجهينها عند قراءتك ليافطات الطريق أو لأسماء المحلات؟

**(اقرأ/اقرئي الاختيارات)**

(ضع/ضعى دائرة حول إجابة واحدة)

| لا تواجه/تواجهين صعوبة بتاتًا | 1 |
| --- | --- |
| **تواجه/تواجهين قليلاً من الصعوبة** | **2** |
| **تواجه/تواجهين صعوبة معتدلة** | **3** |
| **تواجه/تواجهين صعوبة شديدة جدًا** | **4** |
| **توقفت عن القيام بذلك بسبب بصرك** | **5** |
| **توقفت عن القيام بذلك لأسباب أخرى أو لأنّك غير مهتم/مهتمة بعمل ذلك** | **6** |

9. بسبب بصرك، ما درجة الصعوبة التي تواجهها/تواجهينها عندما تنزل/تنزلين على درجات أو سلالم أو عن الرصيف، في ضوء ضعيف أو فى الليل؟

**(اقرأ/اقرئي الاختيارات)**

(ضع/ضعى دائرة حول إجابة واحدة)

| لا تواجه/تواجهين صعوبة بتاتًا | 1 |
| --- | --- |
| **تواجه/تواجهين قليلاً من الصعوبة** | **2** |
| **تواجه/تواجهين صعوبة معتدلة** | **3** |
| **تواجه/تواجهين صعوبة شديدة جدًا** | **4** |
| **توقفت عن القيام بذلك بسبب بصرك** | **5** |
| **توقفت عن القيام بذلك لأسباب أخرى أو لأنّك غير مهتم/مهتمة بعمل ذلك** | **6** |

10. بسبب بصرك، ما درجة الصعوبة التي تواجهها/تواجهينها في ملاحظة الأشياء الجانبية أثناء سيرك على الأقدام؟

**(اقرأ/اقرئي الاختيارات)**

(ضع/ضعى دائرة حول إجابة واحدة)

| لا تواجه/تواجهين صعوبة بتاتًا | 1 |
| --- | --- |
| **تواجه/تواجهين قليلاً من الصعوبة** | **2** |
| **تواجه/تواجهين صعوبة معتدلة** | **3** |
| **تواجه/تواجهين صعوبة شديدة جدًا** | **4** |
| **توقفت عن القيام بذلك بسبب بصرك** | **5** |
| **توقفت عن القيام بذلك لأسباب أخرى أو لأنّك غير مهتم/مهتمة بعمل ذلك** | **6** |

11. بسبب بصرك، ما درجة الصعوبة التي تواجهها/تواجهينها في رؤية ردّ فعل الآخرين على الأشياء التي تقولها/تقولينها ؟

**(اقرأ/اقرئي الاختيارات)**

(ضع/ضعى دائرة حول إجابة واحدة)

| لا تواجه/تواجهين صعوبة بتاتًا | 1 |
| --- | --- |
| **تواجه/تواجهين قليلاً من الصعوبة** | **2** |
| **تواجه/تواجهين صعوبة معتدلة** | **3** |
| **تواجه/تواجهين صعوبة شديدة جدًا** | **4** |
| **توقفت عن القيام بذلك بسبب بصرك** | **5** |
| **توقفت عن القيام بذلك لأسباب أخرى أو لأنّك غير مهتم/مهتمة بعمل ذلك** | **6** |

12. بسبب بصرك، ما درجة الصعوبة التي تواجهها/تواجهينها في اختيار وتنسيق ملابسك؟

**(اقرأ/اقرئي الاختيارات)**

(ضع/ضعى دائرة حول إجابة واحدة)

| لا تواجه/تواجهين صعوبة بتاتًا | 1 |
| --- | --- |
| **تواجه/تواجهين قليلاً من الصعوبة** | **2** |
| **تواجه/تواجهين صعوبة معتدلة** | **3** |
| **تواجه/تواجهين صعوبة شديدة جدًا** | **4** |
| **توقفت عن القيام بذلك بسبب بصرك** | **5** |
| **توقفت عن القيام بذلك لأسباب أخرى أو لأنّك غير مهتم/مهتمة بعمل ذلك** | **6** |

13. بسبب بصرك، ما درجة الصعوبة التي تواجهها/تواجهينها في لقاء الناس في بيوتهم، في الحفلات أو في المطاعم؟

**(اقرأ/اقرئي الاختيارات)**

(ضع/ضعى دائرة حول إجابة واحدة)

| لا تواجه/تواجهين صعوبة بتاتًا | 1 |
| --- | --- |
| **تواجه/تواجهين قليلاً من الصعوبة** | **2** |
| **تواجه/تواجهين صعوبة معتدلة** | **3** |
| **تواجه/تواجهين صعوبة شديدة جدًا** | **4** |
| **توقفت عن القيام بذلك بسبب بصرك** | **5** |
| **توقفت عن القيام بذلك لأسباب أخرى أو لأنّك غير مهتم/مهتمة بعمل ذلك** | **6** |

14. بسبب بصرك، ما درجة الصعوبة التي تواجهها/تواجهينها في الخروج لمشاهدة السينما، أو المسرحيات أو الأحداث الرياضية؟

**(اقرأ/اقرئي الاختيارات)**

(ضع/ضعى دائرة حول إجابة واحدة)

| لا تواجه/تواجهين صعوبة بتاتًا | 1 |
| --- | --- |
| **تواجه/تواجهين قليلاً من الصعوبة** | **2** |
| **تواجه/تواجهين صعوبة معتدلة** | **3** |
| **تواجه/تواجهين صعوبة شديدة جدًا** | **4** |
| **توقفت عن القيام بذلك بسبب بصرك** | **5** |
| **توقفت عن القيام بذلك لأسباب أخرى أو لأنّك غير مهتم/مهتمة بعمل ذلك** | **6** |

15. الآن، أريد أن أسألك عن سواقة السيارة. هل تسوق/تسوقين في الوقت الحالي، حتى ولو نادرًا جدًا؟

(ضع/ضعى دائرة حول إجابة واحدة)

| نعم | 1 | انتقل إلى سؤال 15 ج |
| --- | --- | --- |
|  |  |  |
| لا | 2 |  |

15أ. إذا كانت الإجابة لا، فاسأل: ألم تسوق/تسوقى سيارة فى حياتك أبدًا أم أنك توقفت عن السواقة؟

(ضع/ضعى دائرة حول إجابة واحدة)

| لم أسق أبدًا | 1 | *انتقل إلى الجزء الثالث، سؤال 17* |
| --- | --- | --- |
|  |  |  |
| توقفت | 2 |  |

15ب. إذا توقف أو توقفت عن السواقة: هل كان بصرك السبب الرئيسي لذلك، أم لأسباب رئيسية أخرى، أم بسبب بصرك وأسباب أخرى معًا؟

(ضع/ضعى دائرة حول إجابة واحدة)

| بشكل رئيسي بسبب بصري | 1 | انتقل إلى الجزء الثالث، سؤال 17 |
| --- | --- | --- |
|  |  |  |
| بشكل رئيسي لأسباب أخرى | **2** | انتقل إلى الجزء الثالث، سؤال 17 |
|  |  |  |
| بسبب بصري وأسباب أخرى معًا | **3** | انتقل إلى الجزء الثالث، سؤال 17 |

15ج. إذا كان يسوق/كانت تسوق في الوقت الحالي: ما درجة الصعوبة التي تواجهها/تواجهينها في السواقة أثناء ساعات النهار في الأماكن المعتادة؟

(ضع/ضعى دائرة حول إجابة واحدة)

| لا تواجه/تواجهين صعوبة بتاتًا | 1 |
| --- | --- |
| **تواجه/تواجهين قليلاً من الصعوبة** | **2** |
| **تواجه/تواجهين صعوبة معتدلة** | **3** |
| **تواجه/تواجهين صعوبة شديدة جدًا** | **4** |

16. ما درجة الصعوبة التي تواجهها/تواجهينها في السواقة أثناء الليل؟

**(اقرأ/اقرئي الاختيارات)**

(ضع/ضعى دائرة حول إجابة واحدة)

| لا تواجه/تواجهين صعوبة بتاتًاً | 1 |
| --- | --- |
| **تواجه/تواجهين قليلاً من الصعوبة** | **2** |
| **تواجه/تواجهين صعوبة معتدلة** | **3** |
| **تواجه/تواجهين صعوبة شديدة جدًا** | **4** |
| **توقفت عن القيام بذلك بسبب بصرك** | **5** |
| **توقفت عن القيام بذلك لأسباب أخرى أو لأنّك غير مهتم/مهتمة بعمل ذلك** | **6** |

16أ. ما درجة الصعوبة التي تواجهها/تواجهينها عند السواقة في ظروف صعبة، كالطقس الرديء، ساعة الذروة (أى ساعة خروج الموظفين والمدارس)، على الطريق السريع، أو في ازدحام المدينة؟

**(اقرأ/اقرئي الاختيارات)**

(ضع/ضعى دائرة حول إجابة واحدة)

| لا تواجه/تواجهين صعوبة بتاتًا | 1 |
| --- | --- |
| **تواجه/تواجهين قليلاً من الصعوبة** | **2** |
| **تواجه/تواجهين صعوبة معتدلة** | **3** |
| **تواجه/تواجهين صعوبة شديدة جدًا** | **4** |
| **توقفت عن القيام بذلك بسبب بصرك** | **5** |
| **توقفت عن القيام بذلك لأسباب أخرى أو لأنّك غير مهتم/مهتمة بعمل ذلك** | **6** |

**الجزء الثالث** – **عواقب مشاكل البصر**

الأسئلة التالية تستفسر عن تأثير بصرك على الأشياء التي تقوم/تقومين بها. لكل سؤال، أريد أن تخبرني/تخبرينَنى إذا كان الأمر صحيحًا بالنسبة لك دائمًا، معظم الوقت، أحيانًا، نادرًا، أو أبدًا.

(ضع/ضعى دائرة حول إجابة واحدة في كل سطر)

| **اقرأ/اقرئي الاختيارات:** | **دائمًا** | **معظم الوقت** | **أحيانًا** | **نادرًا** | **أبدًا** |
| --- | --- | --- | --- | --- | --- |
| 17. هل تنجز/تنجزين أقل مما ترغب/ترغبين بسبب بصرك؟ | **1** | **2** | **3** | **4** | **5** |
| 18. هل أنت مُقيّد/مُقيَّدة في الفترة الزمنية التي تستطيع/تستطيعين العمل بها أو في قدرتك على القيام بنشاطات أخرى بسبب بصرك؟ | **1** | **2** | **3** | **4** | **5** |
| 19. هل الألم أو الشعور بعدم الراحة في عينيْك أو حولهما كالحرقان أو الحكّة أو الوجع يمنعك من القيام بما تريد/تريدين أن تفعل/تفعلين؟ | **1** | **2** | **3** | **4** | **5** |

لكل جملة من الجمل التالية، الرجاء إخباري إذا ما كانت صحيحة تمامًا، معظمها صحيح، معظمها غير صحيح أو غير صحيحة نهائيًا بالنسبة لك أو أنك غير متأكد/متأكدة.

|  |  | (ضع/ضعى دائرة حول إجابة واحدة في كل سطر) | | | | |
| --- | --- | --- | --- | --- | --- | --- |
|  |  |  | | | | |
|  |  | صحيحة تمامًا | معظمها صحيح | غير متأكد/متأكدة | معظمها غير صحيح | غير صحيحة نهائيًا |
|  |  |  |  |  |  |  |
| 20. | أبقى في البيت معظم الوقت بسبب بصري | 1 | 2 | 3 | 4 | 5 |
|  |  |  |  |  |  |  |
| 21. | أشعر بالإحباط في كثير من الوقت بسبب بصري | 1 | 2 | 3 | 4 | 5 |
|  |  |  |  |  |  |  |
| 22. | تأثيرى على كل ما أقوم به أقل بكثير بسبب بصري | 1 | 2 | 3 | 4 | 5 |
|  |  |  |  |  |  |  |
| 23. | بسبب بصري، يجب عليّ أن أعتمد بشكل كبير جدًا على ما يقوله لي الآخرون | 1 | 2 | 3 | 4 | 5 |
|  |  |  |  |  |  |  |
| 24. | أحتاج إلى مساعدة كبيرة من الآخرين بسبب بصري | 1 | 2 | 3 | 4 | 5 |
|  |  |  |  |  |  |  |
| 25. | أقلق من القيام بأشياء ستحرجني أو تحرج الآخرين، بسبب بصري | 1 | 2 | 3 | 4 | 5 |

هذه هي نهاية المقابلة. نشكرك جزيل الشُكر على وقتك وعلى مساعدتك.

-

Part three (Supplements 2): Original English version of NEI VFQ 25

National Eye Institute

Visual Functioning Questionnaire - 25
(VFQ-25)

version 2000

(INTERVIEWER ADMINISTERED FORMAT)

January 2000

**RAND hereby grants permission to use the "National Eye Institute Visual Functioning Questionnaire 25 (VFQ-25) July 1996, in accordance with the following conditions which shall be assumed by all to have been agreed to as a consequence of accepting and using this document:**

**1. Changes to the NEI VFQ-25 - July 1996 may be made without the written permission of RAND. However, all such changes shall be clearly identified as having been made by the recipient.**

**2. The user of this NEI VFQ-25 - July 1996 accepts full responsibility, and agrees to hold RAND harmless, for the accuracy of any translations of the NEI VFQ-25 Test Version - July 1996 into another language and for any errors, omissions, misinterpretations, or consequences thereof.**

**3. The user of this NEI VFQ-25 - July 1996 accepts full responsibility, and agrees to hold RAND harmless, for any consequences resulting from the use of the NEI VFQ-25.**

**4. The user of the NEI VFQ-25 - July 1996 will provide a credit line when printing and distributing this document or in publications of results or analyses based on this instrument acknowledging that it was developed at RAND under the sponsorship of the National Eye Institute.**

**5. No further written permission is needed for use of this NEI VFQ-25 - July 1996.**

**7/29/96**

**©** R **1996**

Instructions:

I’m going to read you some statements about problems which involve your vision or feelings that you have about your vision condition. After each question I will read you a list of possible answers. Please choose the response that best describes your situation.

Please answer all the questions as if you were wearing your glasses or contact lenses (if any).

Please take as much time as you need to answer each question. All your answers are confidential. In order for this survey to improve our knowledge

about vision problems and how they affect your quality of life, your answers must be as accurate as possible. Remember, if you wear glasses or contact lenses for a particular activity, please answer all of the following questions as though you were wearing them.

**Visual Functioning Questionnaire - 25**

PART 1 - GENERAL HEALTH AND VISION

**1. In general, would you say your overall health is*:**

*(Circle One)*

**READ CATEGORIES: Excellent............................... 1**

**Very Good ............................ 2**

**Good ...................................... 3**

**Fair ......................................... 4**

**Poor........................................ 5**

**2. At the present time, would you say your eyesight using both eyes (with glasses or contact lenses, if you wear them) is excellent, good, fair, poor, or very poor or are you completely blind?**

*(Circle One)*

**READ CATEGORIES: Excellent............................... 1**

**Good ..................................... 2**

**Fair ......................................... 3**

**Poor....................................... 4**

**Very Poor.............................. 5**

**Completely Blind.................. 6**

*** Skip Question 1 when the VFQ-25 is administered at the same time as the SF-36 or RAND 36-Item Health Survey 1.0**

**3. How much of the time do you worry about your eyesight?**

*(Circle One)*

**READ CATEGORIES: None of the time ...................... 1**

**A little of the time........................ 2**

**Some of the time ......................... 3**

**Most of the time............................ 4**

**All of the time?.............................. 5**

**4. How much pain or discomfort have you had in and around your eyes**

**(for example, burning, itching, or aching)? Would you say it is:**

*(Circle One)*

**READ CATEGORIES: None.................................... 1**

**Mild...................................... 2**

**Moderate............................. 3**

**Severe, or ........................... 4**

**Very severe?....................... 5**

PART 2 - DIFFICULTY WITH ACTIVITIES

**The next questions are about how much difficulty, if any, you have doing certain activities wearing your glasses or contact lenses if you use them for that activity.**

**5. How much difficulty do you have reading ordinary print in newspapers? Would you say you have:**

(READ CATEGORIES AS NEEDED)

*(Circle One)*

**No difficulty at all ............................................. 1**

**A little difficulty.................................................. 2**

**Moderate difficulty............................................ 3**

**Extreme difficulty.............................................. 4**

**Stopped doing this because of your eyesight...5**

**Stopped doing this for other reasons or not interested in doing this.................................... 6**

**6. How much difficulty do you have doing work or hobbies that require you to see well up close, such as cooking, sewing, fixing things around the house, or using hand tools? Would you say:**

(READ CATEGORIES AS NEEDED)

*(Circle One)*

**No difficulty at all ............................................. 1**

**A little difficulty.................................................. 2**

**Moderate difficulty............................................ 3**

**Extreme difficulty.............................................. 4**

**Stopped doing this because of your eyesight...5**

**Stopped doing this for other reasons or not interested in doing this.................................... 6**

**7. Because of your eyesight, how much difficulty do you have finding something on a crowded shelf?**

(READ CATEGORIES AS NEEDED)

*(Circle One)*

**No difficulty at all ............................................. 1**

**A little difficulty.................................................. 2**

**Moderate difficulty............................................ 3**

**Extreme difficulty.............................................. 4**

**Stopped doing this because of your eyesight...5**

**Stopped doing this for other reasons or not interested in doing this.................................... 6**

**8. How much difficulty do you have reading street signs or the names of stores?**

(READ CATEGORIES AS NEEDED)

*(Circle One)*

**No difficulty at all ............................................. 1**

**A little difficulty.................................................. 2**

**Moderate difficulty............................................ 3**

**Extreme difficulty.............................................. 4**

**Stopped doing this because of your eyesight...5**

**Stopped doing this for other reasons or not interested in doing this.................................... 6**

**9. Because of your eyesight, how much difficulty do you have going down steps, stairs, or curbs in dim light or at night?**

(READ CATEGORIES AS NEEDED)

*(Circle One)*

**No difficulty at all ............................................. 1**

**A little difficulty.................................................. 2**

**Moderate difficulty............................................ 3**

**Extreme difficulty.............................................. 4**

**Stopped doing this because of your eyesight...5**

**Stopped doing this for other reasons or not interested in doing this.................................... 6**

**10. Because of your eyesight, how much difficulty do you have noticing objects off to the side while you are walking along?**

(READ CATEGORIES AS NEEDED)

*(Circle One)*

**No difficulty at all ............................................. 1**

**A little difficulty.................................................. 2**

**Moderate difficulty............................................ 3**

**Extreme difficulty.............................................. 4**

**Stopped doing this because of your eyesight...5**

**Stopped doing this for other reasons or not interested in doing this.................................... 6**

**11. Because of your eyesight, how much difficulty do you have seeing how people react to things you say?**

(READ CATEGORIES AS NEEDED)

*(Circle One)*

**No difficulty at all ............................................. 1**

**A little difficulty.................................................. 2**

**Moderate difficulty............................................ 3**

**Extreme difficulty.............................................. 4**

**Stopped doing this because of your eyesight...5**

**Stopped doing this for other reasons or not interested in doing this.................................... 6**

**12. Because of your eyesight, how much difficulty do you have picking out and matching your own clothes?**

(READ CATEGORIES AS NEEDED)

*(Circle One)*

**No difficulty at all ............................................. 1**

**A little difficulty.................................................. 2**

**Moderate difficulty............................................ 3**

**Extreme difficulty.............................................. 4**

**Stopped doing this because of your eyesight...5**

**Stopped doing this for other reasons or not interested in doing this.................................... 6**

**13. Because of your eyesight, how much difficulty do you have visiting with people in their homes, at parties, or in restaurants?**

(READ CATEGORIES AS NEEDED)

*(Circle One)*

**No difficulty at all ............................................. 1**

**A little difficulty.................................................. 2**

**Moderate difficulty............................................ 3**

**Extreme difficulty.............................................. 4**

**Stopped doing this because of your eyesight...5**

**Stopped doing this for other reasons or not interested in doing this.................................... 6**

**14. Because of your eyesight, how much difficulty do you have going out to see movies, plays, or sports events?**

(READ CATEGORIES AS NEEDED)

*(Circle One)*

**No difficulty at all ............................................. 1**

**A little difficulty.................................................. 2**

**Moderate difficulty............................................ 3**

**Extreme difficulty.............................................. 4**

**Stopped doing this because of your eyesight...5**

**Stopped doing this for other reasons or not interested in doing this.................................... 6**

**15. Now, I’d like to ask about driving a car. Are you currently driving, at least once in a while?**

*(Circle One)* **Yes..................... 1** *Skip To Q 15c* **No ...................... 2**

**15a. IF NO, ASK: Have you never driven a car or have you given up driving?**

*(Circle One)*

**Never drove........ 1** *Skip To Part 3, Q 17*

**Gave up............... 2**

**15b. IF GAVE UP DRIVING: Was that mainly because of your eyesight, mainly for some other reason, or because of both your eyesight and other reasons?**

*(Circle One)*

**Mainly eyesight.................................. 1** *Skip To Part 3, Q 17*

**Mainly other reasons......................... 2** *Skip To Part 3, Q 17*

**Both eyesight and other reasons .... 3** *Skip To Part 3, Q 17*

**15c. IF CURRENTLY DRIVING: How much difficulty do you have driving during the daytime in familiar places? Would you say you have:**

*(Circle One)*

**No difficulty at all ................................. 1**

**A little difficulty..................................... 2**

**Moderate difficulty............................... 3**

**Extreme difficulty................................. 4**

**16. How much difficulty do you have driving at night? Would you say you have:** (READ CATEGORIES AS NEEDED)

*(Circle One)*

**No difficulty at all ............................................. 1**

**A little difficulty.................................................. 2**

**Moderate difficulty............................................ 3**

**Extreme difficulty.............................................. 4**

**Stopped doing this because of your eyesight...5**

**Stopped doing this for other reasons or not interested in doing this.................................... 6**

**16a. How much difficulty do you have driving in difficult conditions, such as in bad weather, during rush hour, on the freeway, or in city traffic? Would you say you have?**

(READ CATEGORIES AS NEEDED)

*(Circle One)*

**No difficulty at all ............................................. 1**

**A little difficulty.................................................. 2**

**Moderate difficulty............................................ 3**

**Extreme difficulty.............................................. 4**

**Stopped doing this because of your eyesight...5**

**Stopped doing this for other reasons or not interested in doing this.................................... 6**

PART 3: RESPONSES TO VISION PROBLEMS

**The next questions are about how things you do may be affected by your vision. For each one, I’d like you to tell me if this is true for you all, most, some, a little, or none of the time.**

*(Circle One On Each Line)*

**READ CATEGORIES: All of the time**

**Most of the time**

**Some of the time**

**A little of the time**

**None of the time**

**17. Do you accomplish less than you would like because of your vision?**

**1 2 3 4 5**

**18. Are you limited in how long you can work or do other activities because of your vision?.......................**

**1 2 3 4 5**

**19. How much does pain or discomfort in or around your eyes, for example, burning, itching, or aching, keep you from doing what you’d like to**

**be doing? Would you say: 1 2 3 4 5**

**For each of the following statements, please tell me if it is definitely true, mostly true, mostly false, or definitely false for you or you are not sure.**

*(Circle One On Each Line)*

**Definitely Mostly Not Mostly Definitely**

**True True Sure False False**

**20. I stay home most of the time**

**because of my eyesight. .... 1 2 3 4 5**

**21. I feel frustrated a lot of the time because of my**

**eyesight. ................................. 1 2 3 4 5**

**22. I have much less control over what I do, because of**

**my eyesight. .......................... 1 2 3 4 5**

**23. Because of my eyesight, I**

**have to rely too much on**

**what other people tell me... 1 2 3 4 5**

**24. I need a lot of help from others because of my**

**eyesight.................................. 1 2 3 4 5**

**25. I worry about doing things that will embarrass myself or others, because of my**

**eyesight. ................................. 1 2 3 4 5**

***That’s the end of the interview. Thank you very much for your time and your help***
